# Supplementary material for: BSA blocking in enzyme-linked immunosorbent assays is a non-mandatory step: a perspective study on mechanism of BSA blocking in common ELISA protocols
Source: Royal Society of Chemistry journal article supplement (doi:10.1039/c5ra20750a), 2015-01-01
Supplement: c5ra20750a1.pdf [file c5ra20750a1.pdf]

## Supplementary Information

### BSA blocking in enzyme-linked immunosorbent assays is a non-mandatory step: a perspective study on mechanism of BSA blocking in common ELISA protocols

Rajesh Ahirwar, Shilpi Bariar, Abitha Balakrishnan and Pradip Nahar

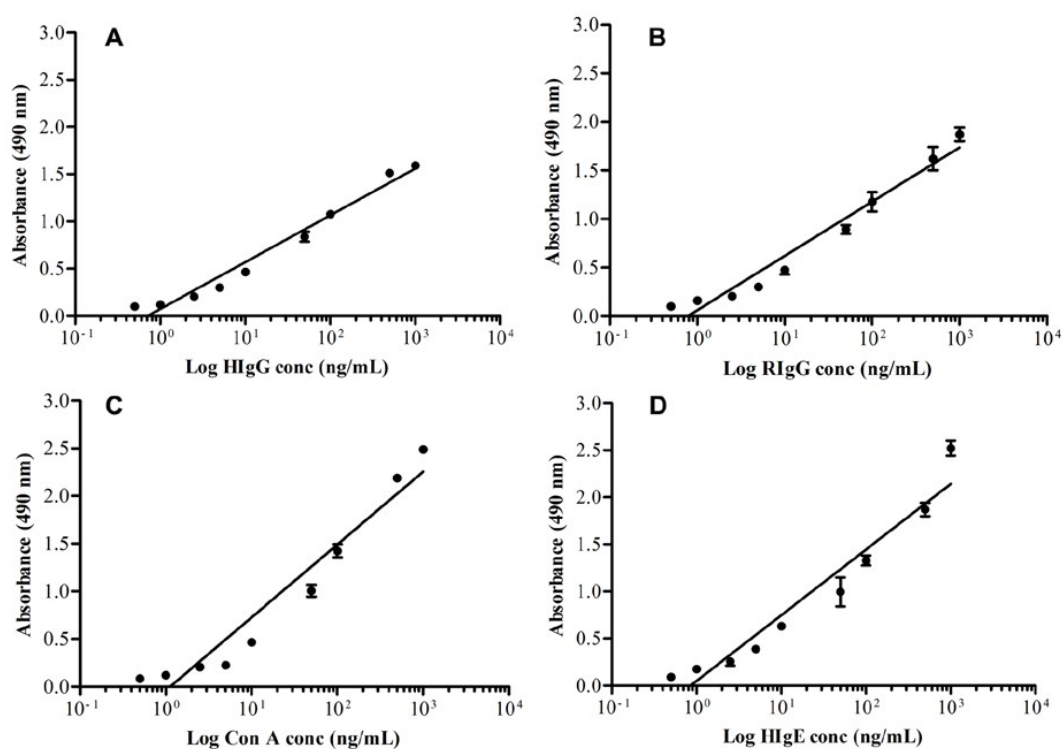

**Figure S1.** Represent the standard curves for HlgG (A), RlgG (B), Con A (C) and HlgE (D) prepared using conventional ELISA.

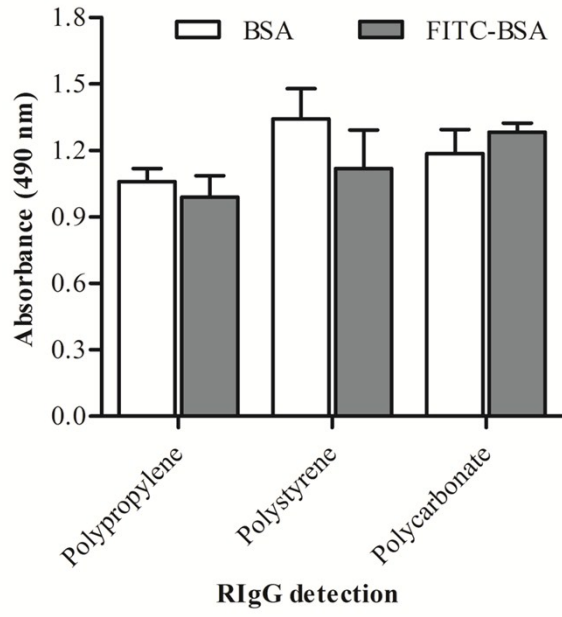

**Figure S2.** Comparison of BSA to FITC-BSA for their blocking efficiency on commonly used microplates in ELISA.
